# Supplementary material
Source: PubMed Central journal article supplement (PMC2916991)
Supplement: tjp0588-2605-SD1.pdf [file tjp0588-2605-SD1.pdf]

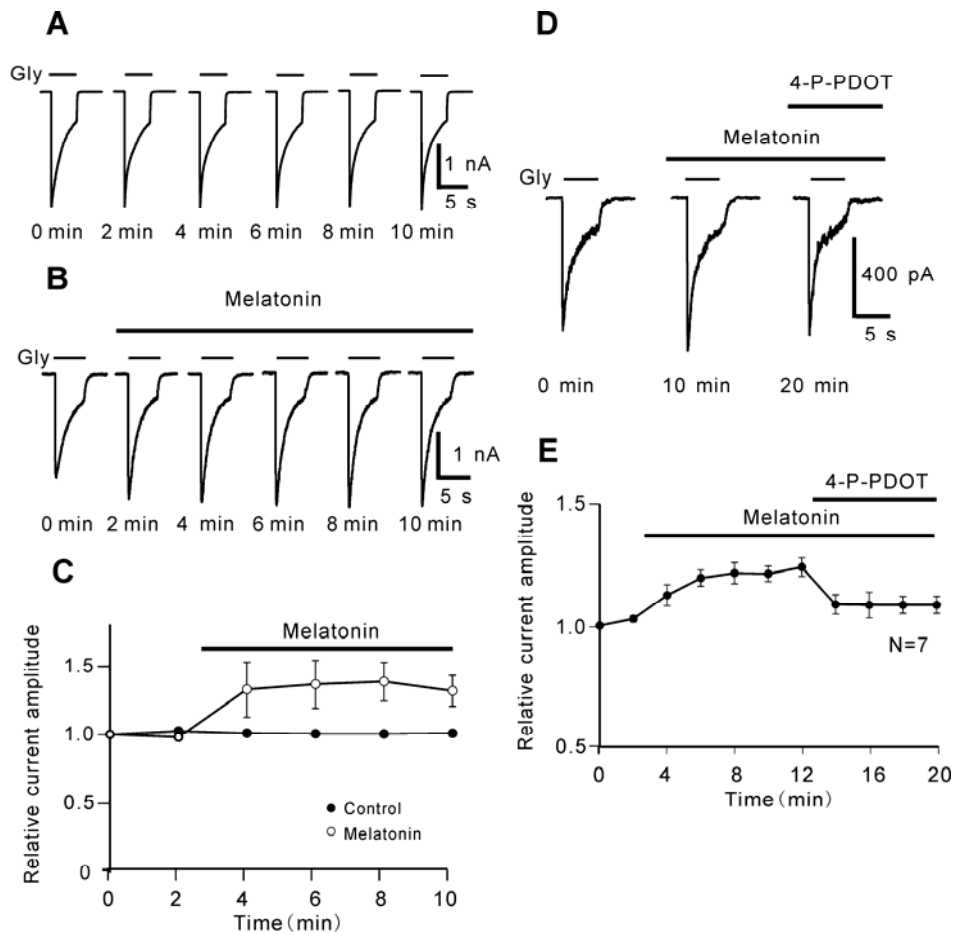

### Supplemental Figure 1. Melatonin potentiates glycine currents in rat retinal ganglion cells (RGCs)

*A*, Glycine currents recorded from an isolated RGC at different times in normal Ringer's. Glycine (Gly) of 100  $\mu$ M was applied for 5 s every 2 min. Note that the current did not show run-down and the current amplitude was almost unchanged during a period of 10 min. *B*, Glycine currents recorded from a RGC at different times during melatonin (10 nM) application, showing that melatonin application gradually increased the current amplitude. *C*, Average peak amplitudes of glycine currents recorded in Ringer's (control,  $n=6$ ) and in the presence of 10 nM melatonin ( $n=12$ ). *D*, Current traces recorded from a RGC, showing that 10 nM melatonin-induced potentiation of the glycine current was blocked by 100 nM 4-P-PDOT. *E*, Average peak amplitudes of glycine currents ( $n=7$ ) are plotted as a function of time. Melatonin potentiated the current, which was blocked by 4-P-PDOT.
